# Supplementary material for: Daurichromenic Acid from the Chinese Traditional Medicinal Plant Rhododendron dauricum Inhibits Sphingomyelin Synthase and Aβ Aggregation
Source: Molecules. 2020 Sep 7;25(18):4077. doi: 10.3390/molecules25184077 (PMC7571127; doi:10.3390/molecules25184077)
Supplement: Supplementary file 1 [file molecules-25-04077-s001.pdf]

Supplementary data

## Daurichromenic acid from the Chinese traditional medicinal plant *Rhododendron dauricum* inhibits sphingomyelin synthase and A $\beta$ aggregation

Hadya Virupaksha Deepak<sup>1</sup>, Mahadeva M. M. Swamy<sup>1</sup>, Yuta Murai<sup>1,2</sup>, Yoshiko Suga<sup>2</sup>, Masaki Anetai<sup>2</sup>, Takuro Yo<sup>3</sup>, Masahiro Kuragano<sup>3</sup>, Koji Uwai<sup>3</sup>, Kiyotaka Tokuraku<sup>3</sup> and Kenji Monde<sup>1,2</sup> \*

<sup>1</sup>Graduate School of Life Science, Hokkaido University, Sapporo, Japan, 001-0021

<sup>2</sup>Faculty of Advanced Life Science, Hokkaido University, Sapporo, Japan, 001-0021

<sup>3</sup>Department of Applied sciences, Muroran Institute of Technology, 27-1 Mizumoto-cho, Muroran, Japan 050-8585,

\*Correspondence: [kmonde@sci.hokudai.ac.jp](mailto:kmonde@sci.hokudai.ac.jp)

S-1

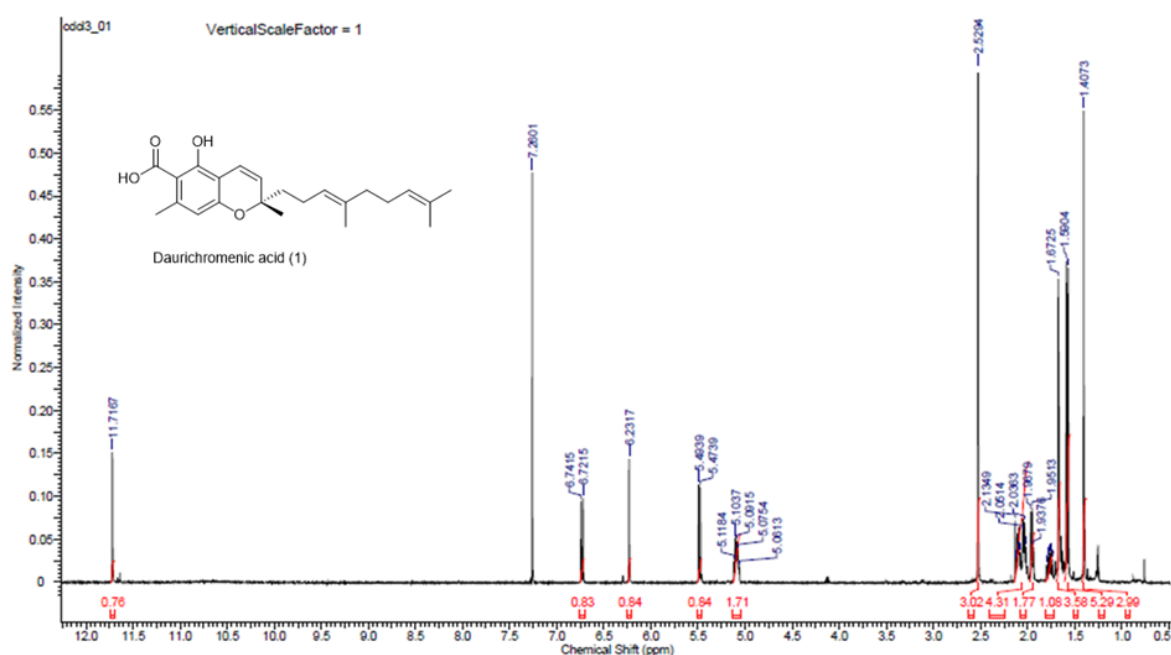

<sup>1</sup>H NMR of Daurichromenic acid (DCA) (1)

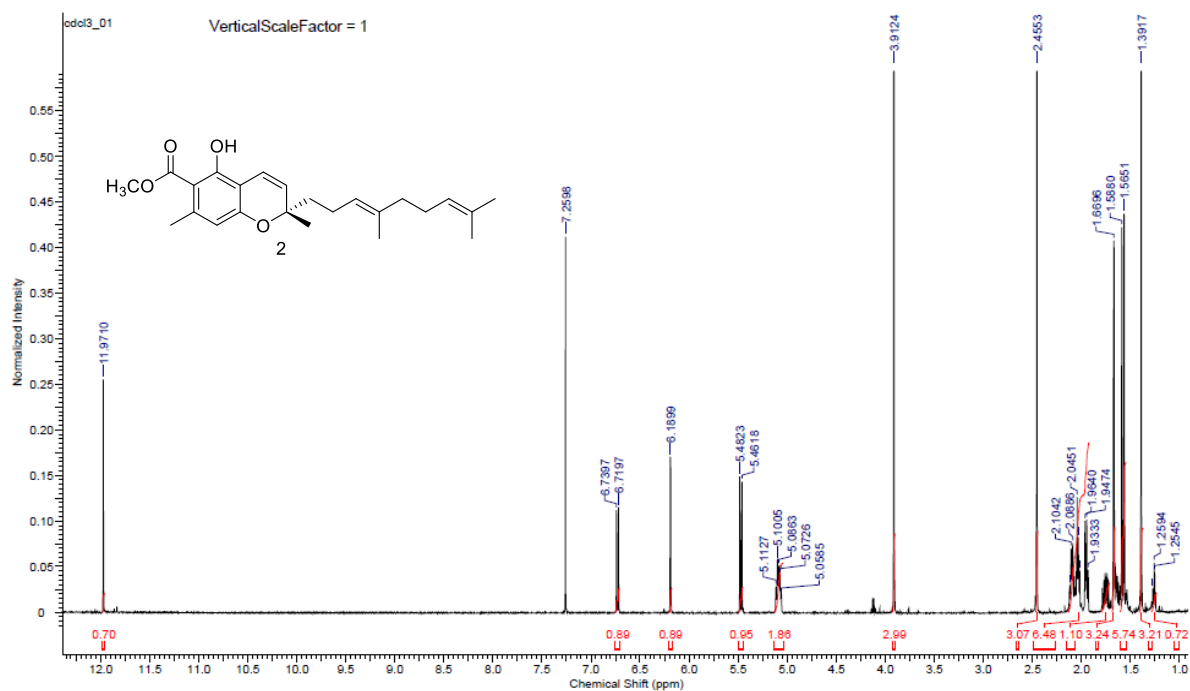

<sup>1</sup>HNMR Methyl ester of daurichromenic acid (2)

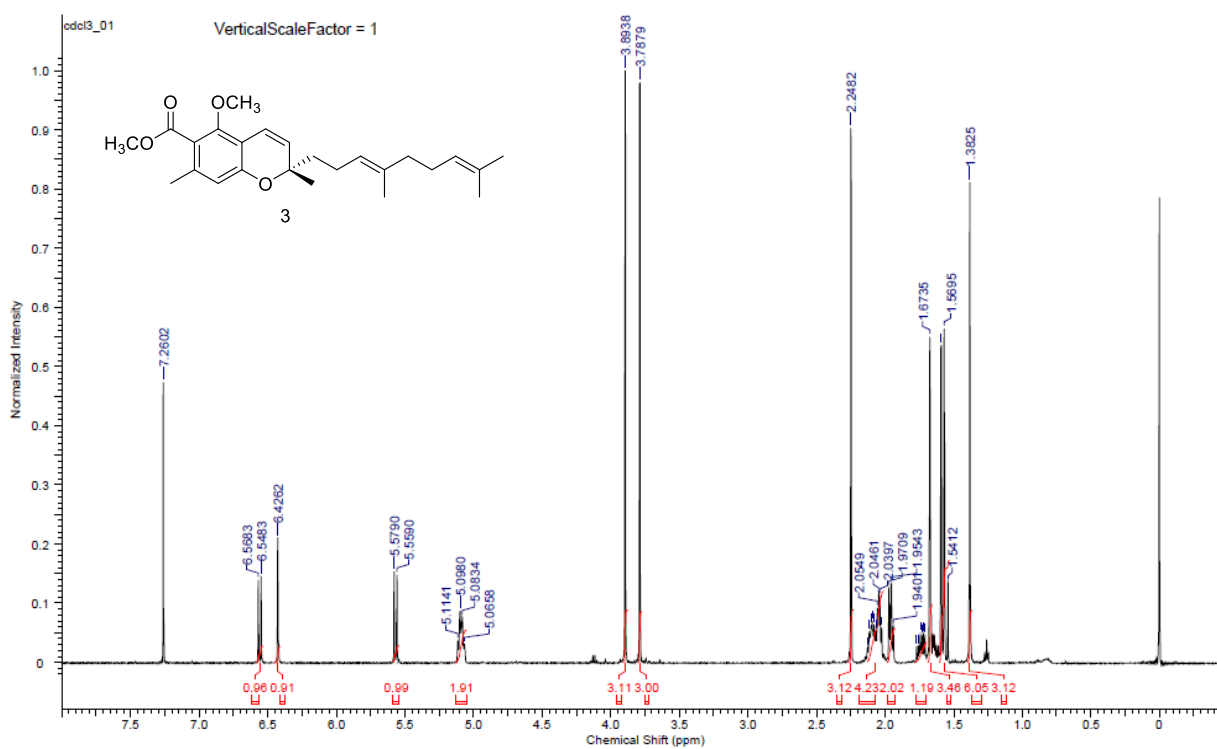

<sup>1</sup>HNMR of Methyl(S,E)-2-(4,8-dimethylnona-3,7-dien-1-yl)-5-methoxy-2,7-dimethyl-2H-chromene-6 carboxylate (3)

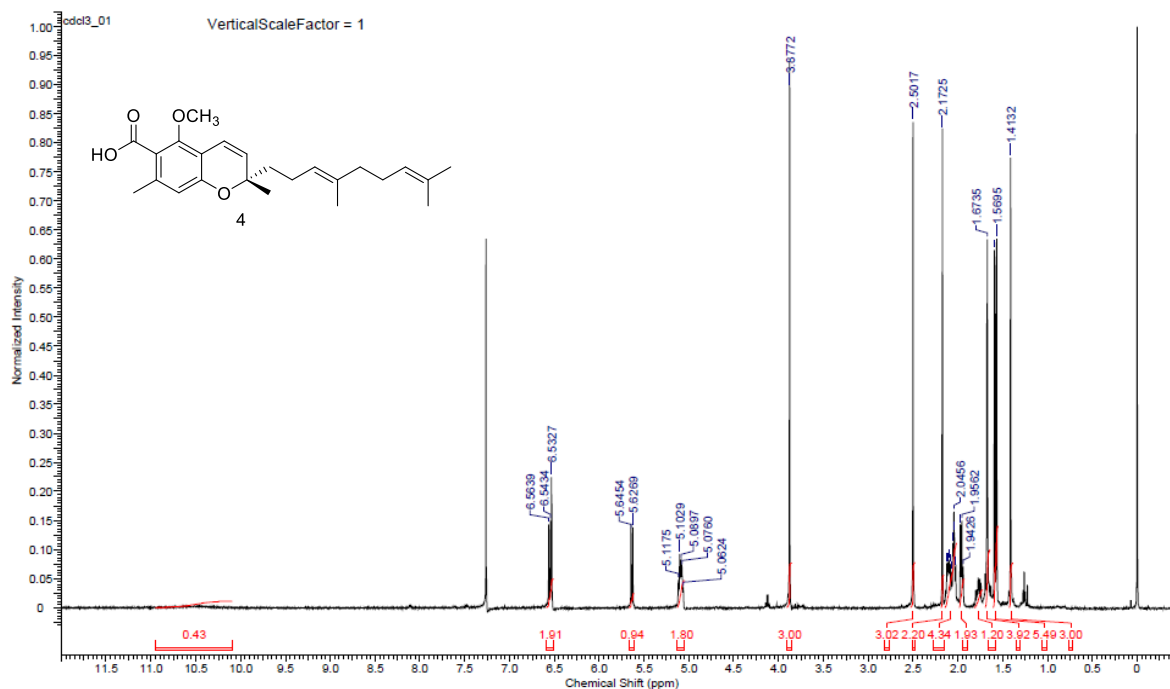

<sup>1</sup>H NMR of *(S,E)*-2-(4,8-dimethylnona-3,7-dien-1-yl)-5-methoxy-2,7-dimethyl-2H-chromene-6-carboxylic acid (**4**)

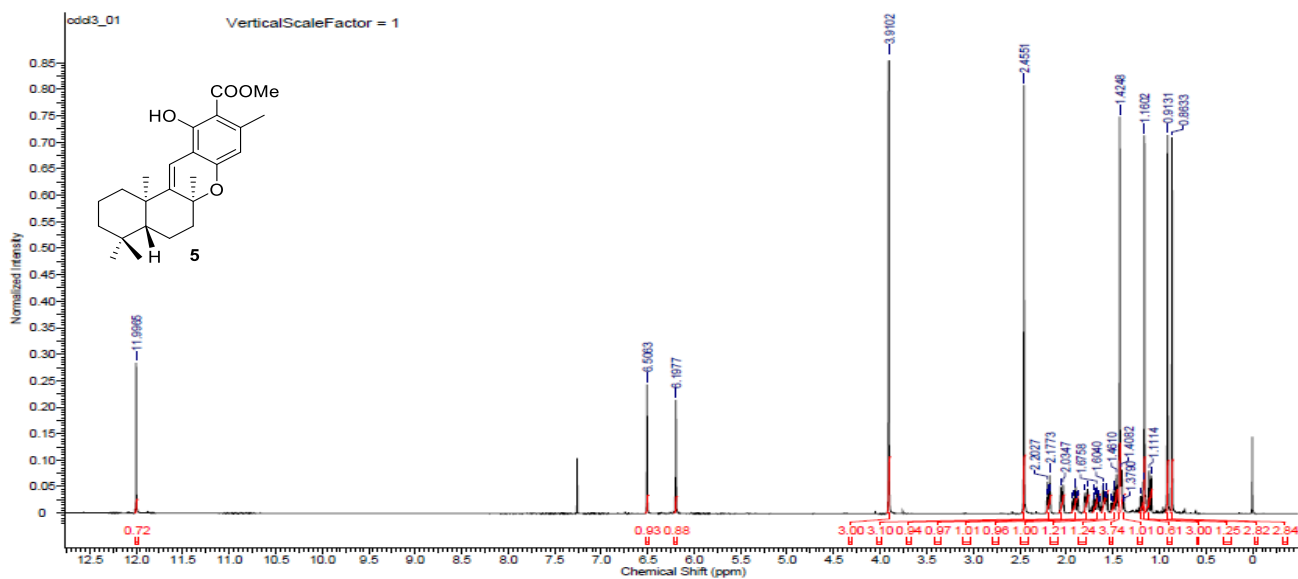

<sup>1</sup>H NMR of *(-)*-(5*R*,8*S*,10*R*)-9,15-didehydro Hongoquercin A methyl ester (**5**)

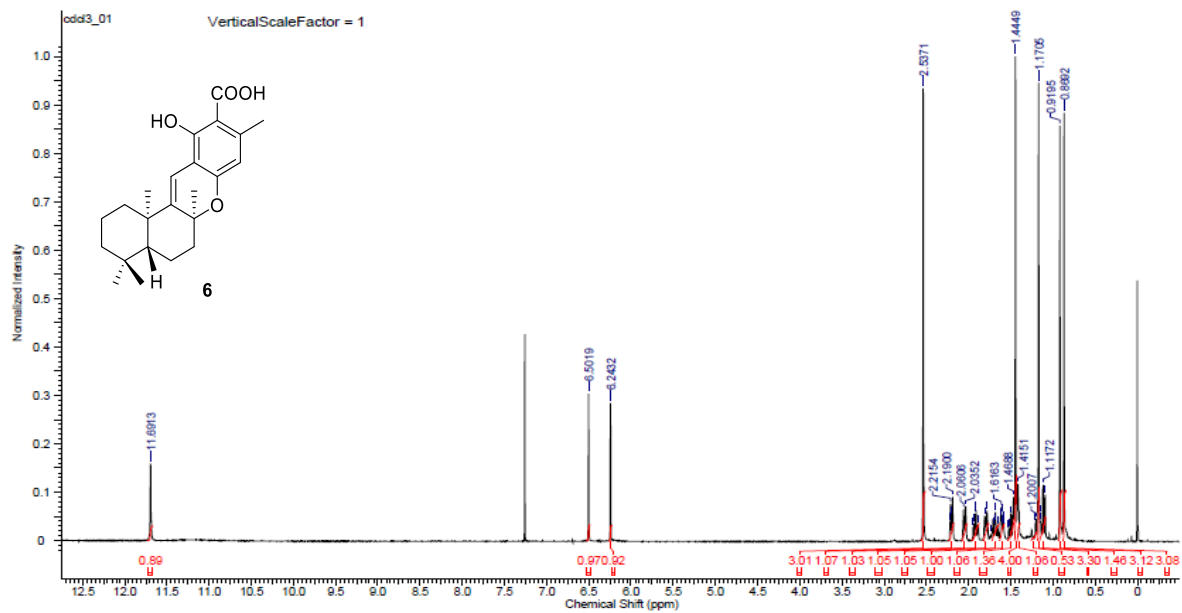

$^1\text{H}$ NMR of  $(-)-(5R,8S,10R)$ -9,15-didehydro Hongoquercin A (**6**)

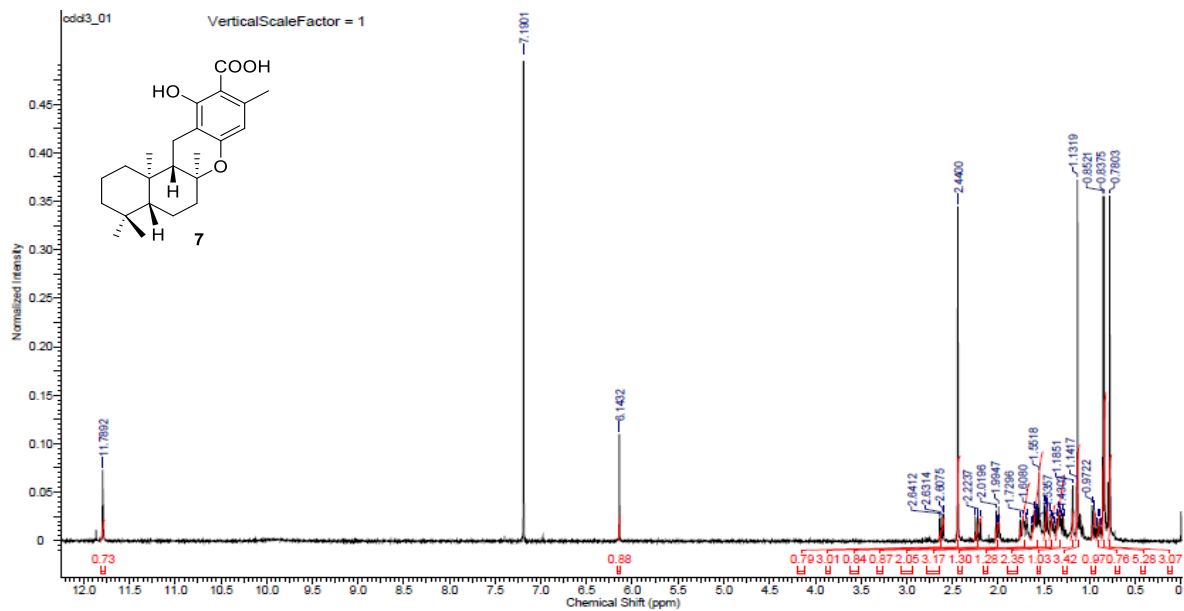

$^1\text{H}$ NMR of hongoquercin A (**7**)

## S-2 Amyloid beta aggregation assay

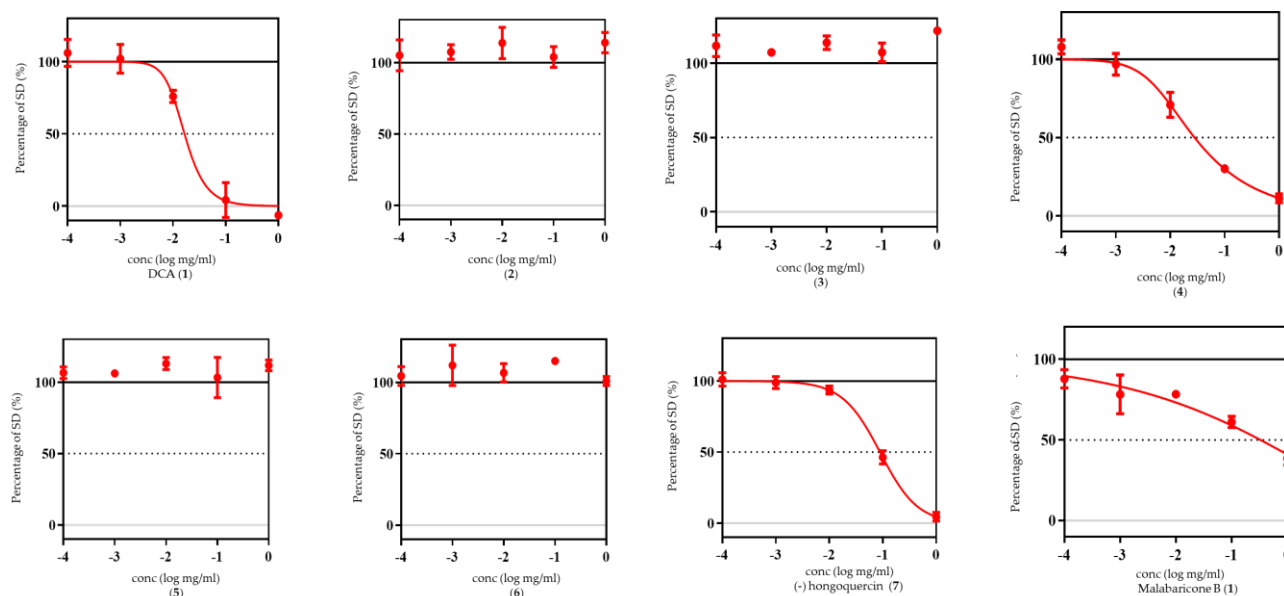

**Figure S-2: Amyloid beta aggregation inhibition by daurichromenic acid and its derivatives:** Inhibition of A $\beta$  aggregation by daurichromenic acid and its derivatives 30 nM QDA $\beta$  and 30  $\mu$ M A $\beta$  were incubated with various concentrations of daurichromenic acid and its derivatives. Estimation of EC<sub>50</sub> values from inhibition curve that are plotted percentage of SD of fluorescence intensities in the micrograph versus concentration of daurichromenic acid and its derivatives. Estimation of EC<sub>50</sub> values from inhibition curve that are plotted percentage of SD of fluorescence intensities in the micrograph versus concentration of daurichromenic acid and its derivatives.
